# Supplementary material for: Knowledge, Attitudes, and Practices of Rural Communities Regarding Antimicrobial Resistance and Climate Change in Adadle District, Somali Region, Ethiopia: A Mixed-Methods Study
Source: MDPI journal article supplement (doi:10.3390/antibiotics13040292), 2024-03-22
Supplement: s1 [file s1]

# Knowledge, Attitudes, and Practices of Rural Communities Regarding Antimicrobial Resistance and Climate Change in Adadle District, Somali Region, Ethiopia: A Mixed-Methods Study

Abdifatah Muktar Muhummed <sup>1,2,3,\*</sup>, Ashenafi Alemu <sup>4</sup>, Yahya Osman Maidane <sup>1,2,3</sup>, Rea Tschopp <sup>1,2,4</sup>, Jan Hattendorf <sup>1,2</sup>, Pascale Vonaesch <sup>5</sup>, Jakob Zinsstag <sup>1,2</sup> and Guéladio Cissé <sup>1,2</sup>

<sup>1</sup> Swiss Tropical and Public Health Institute, Kreuzstrasse 2, 4123 Allschwil, Switzerland; maidane.osman@swisstph.ch (Y.O.); rea.tschopp@swisstph.ch (R.T.); jan.hattendorf@swisstph.ch (J.H.); jakob.zinsstag@swisstph.ch (J.Z.); gueladio.cisse@swisstph.ch (G.C.)

<sup>2</sup> Faculty of Science, University of Basel, Petersplatz 1, 4003 Basel, Switzerland

<sup>3</sup> Institute of Health Science, Jigjiga University, P.O. Box 1020 Jigjiga, Ethiopia

<sup>4</sup> Armauer Hansen Research Institute, P.O. Box 1005 Addis Ababa, Ethiopia; ashenafi.alemu@ahri.gov.et

<sup>5</sup> Department of Fundamental Microbiology, University of Lausanne, UNIL-Sorge, 1015 Lausanne, Switzerland; pascale.vonaesch@unil.ch

\* Correspondence: abdifatah.muhummed@swisstph.ch

## Supplementary Materials

**Table S1.** The knowledge of antimicrobials and antimicrobial resistance in Adadle district, Somali region, Ethiopia.

| Variables                                             | N = 362 <sup>1</sup> |
|-------------------------------------------------------|----------------------|
| Antibiotics can treat common cold                     |                      |
| No                                                    | 115 (31.8%)          |
| Yes                                                   | 247 (68.2%)          |
| Antibiotics can treat diarrhea                        |                      |
| No                                                    | 38 (10.5%)           |
| Yes                                                   | 324 (89.5%)          |
| Antibiotics can kill virus                            |                      |
| No                                                    | 150 (41.8%)          |
| Yes                                                   | 209 (58.2%)          |
| Antibiotics should always be used to treat fever      |                      |
| No                                                    | 105 (29.0%)          |
| Yes                                                   | 257 (71.0%)          |
| Combination antibiotics accelerate infection cure     |                      |
| No                                                    | 39 (10.8%)           |
| Yes                                                   | 323 (89.2%)          |
| Injectable antibiotics are more potent than oral ones |                      |
| No                                                    | 51 (14.1%)           |
| Yes                                                   | 311 (85.9%)          |
| Costly antibiotics are powerful                       |                      |
| No                                                    | 27 (7.5%)            |
| Yes                                                   | 335 (92.5%)          |
| Participant has heard about AMR                       |                      |
| No                                                    | 221 (61.0%)          |
| Yes                                                   | 141 (39.0%)          |
| Human-to-human AMR transmission                       |                      |
| No                                                    | 269 (74.3%)          |

---

|                                                   |     |             |
|---------------------------------------------------|-----|-------------|
|                                                   | Yes | 93 (25.7%)  |
| Human-to-animal AMR transmission is possible      | No  | 198 (54.7%) |
|                                                   | Yes | 164 (45.3%) |
| Human-to-environment AMR transmission is possible | No  | 229 (63.3%) |
|                                                   | Yes | 133 (36.7%) |
| Participant has heard about stewardship programs  | No  | 345 (95.3%) |
|                                                   | Yes | 17 (4.7%)   |
| <sup>1</sup> n (%),                               |     |             |

---

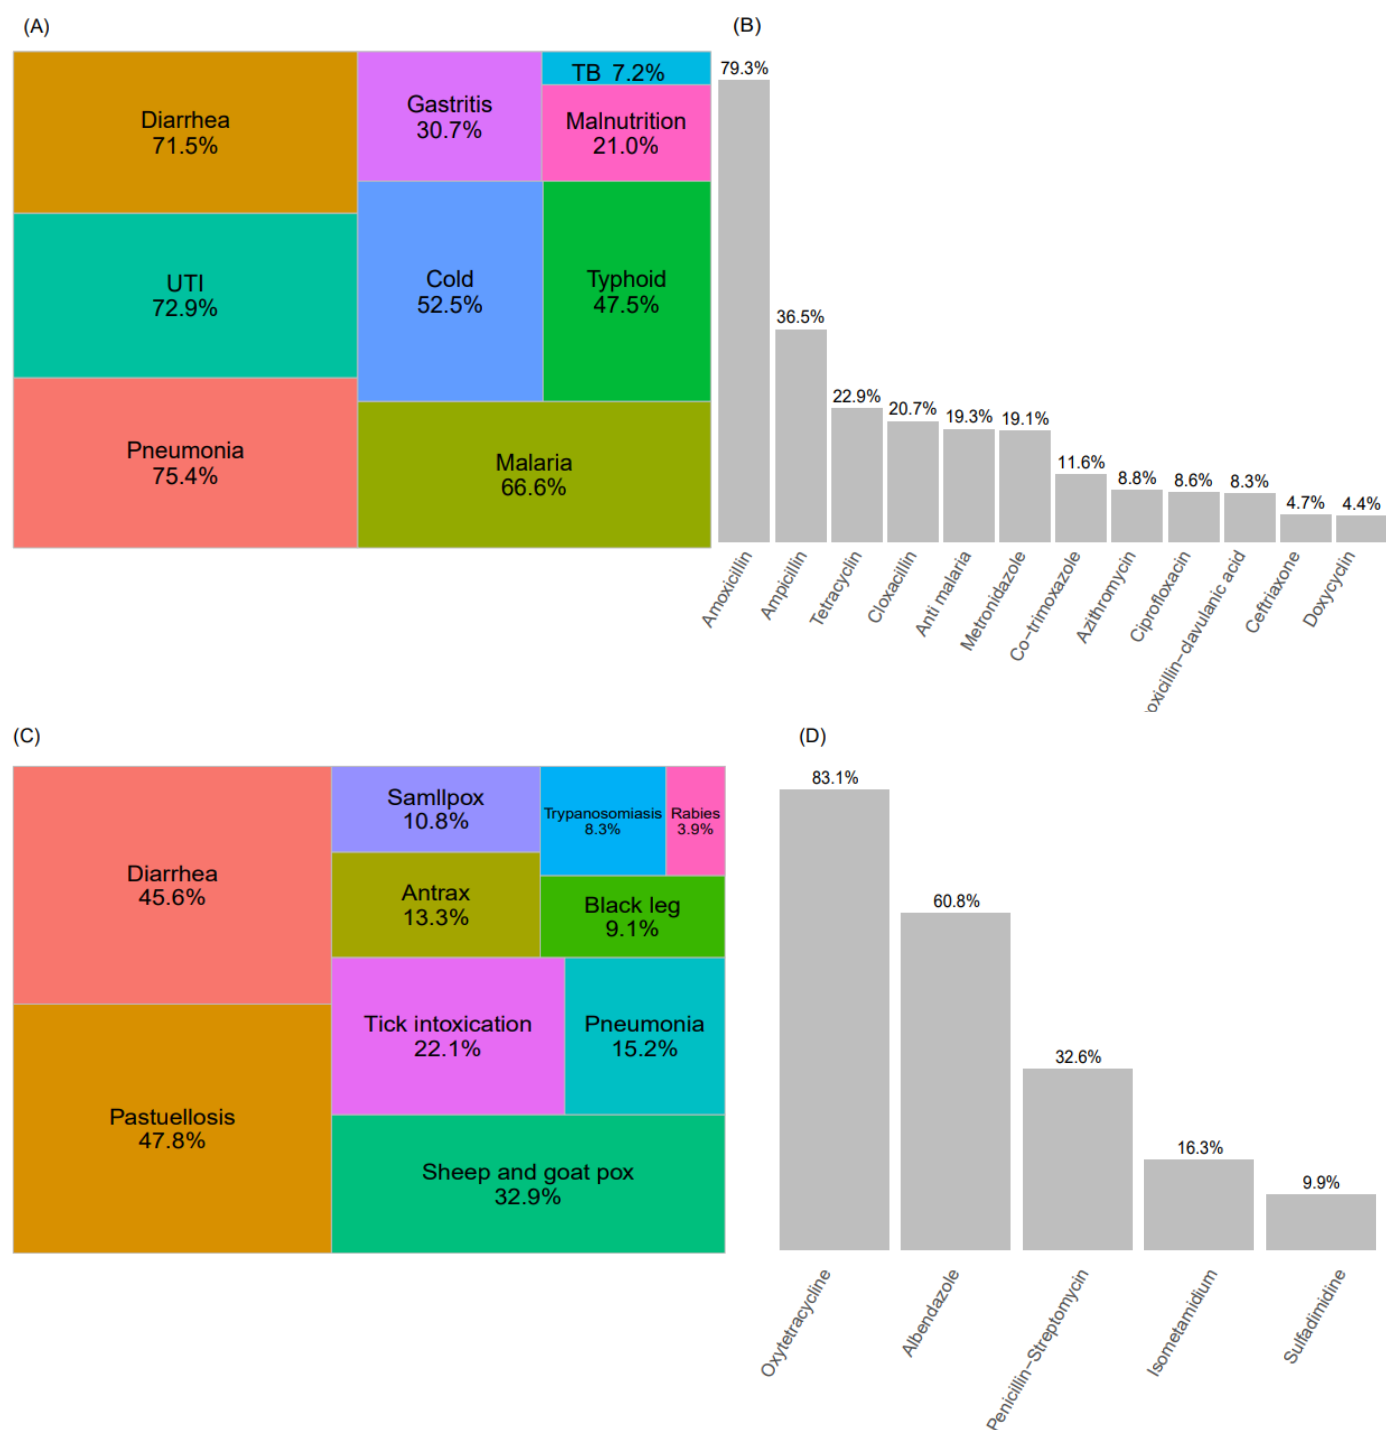

**Figure S1.** Participants reported common human (A) and animal diseases (C), as well as antimicrobial medications used by the participants (B) and for their livestock (D) in Adadle district, Somali region, Ethiopia.

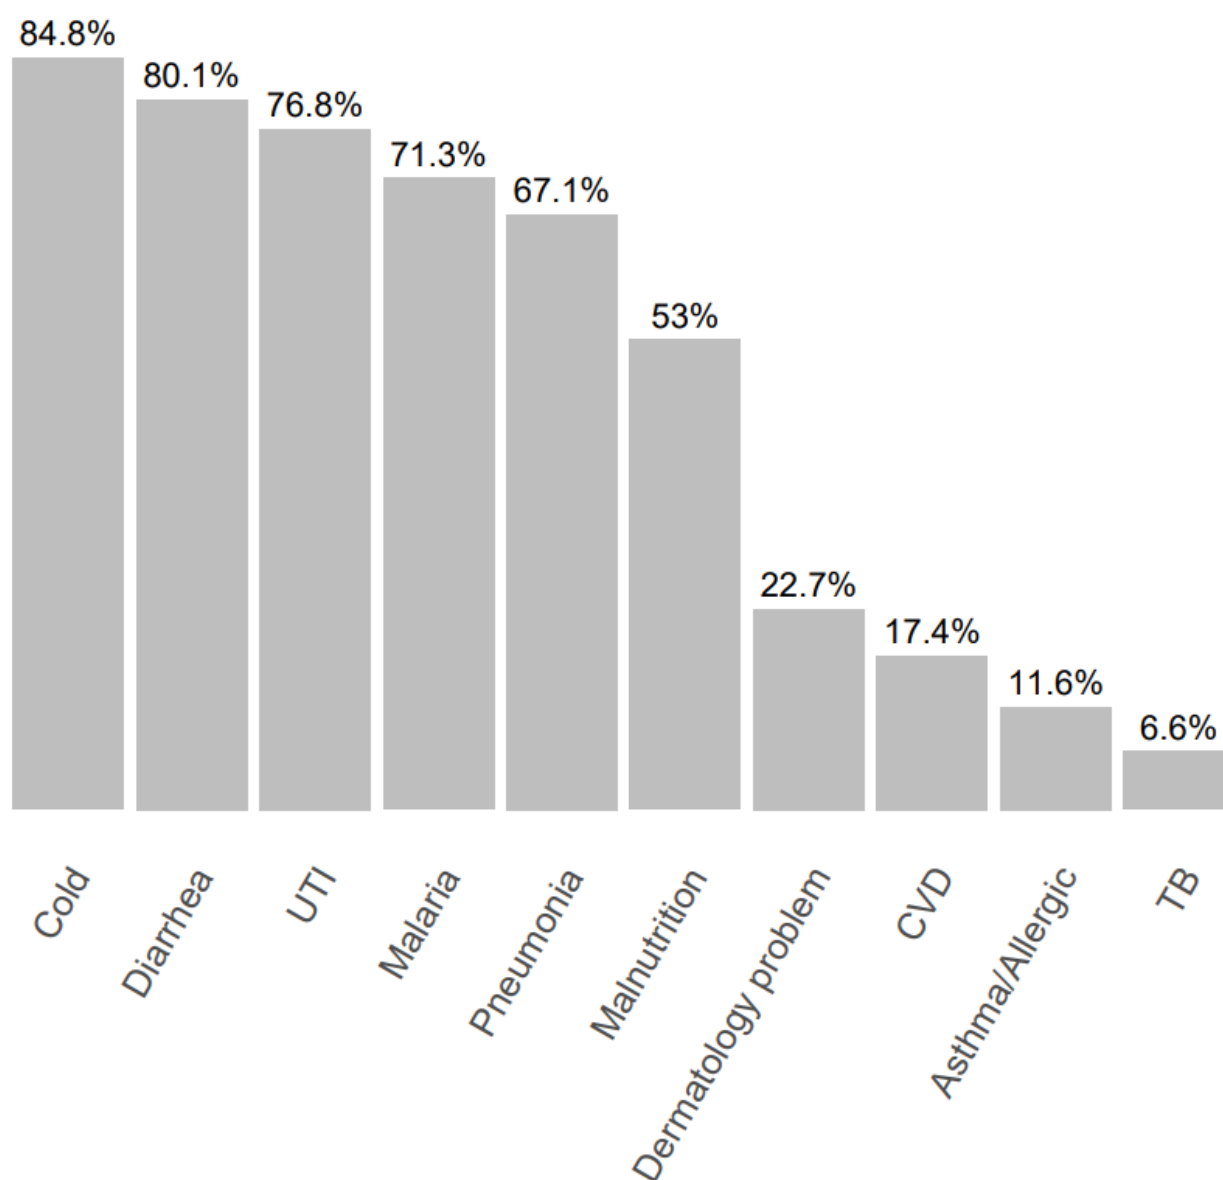

**Figure S2.** Participant's reported illnesses that they have experienced over the past five to ten years.

**Table S2.** The knowledge and attitude of climate change and AMR in Adadle district, Somali region, Ethiopia.

| Variables                                   | N = 362 <sup>1</sup> |
|---------------------------------------------|----------------------|
| Participants has heard climate change       |                      |
| No                                          | 132 (36.5%)          |
| Yes                                         | 230 (63.5%)          |
| Challenges faced due to climate change      |                      |
| Forced to move out from the shelters        | 342 (94.5%)          |
| Lack of food due to drought                 | 123 (33.9%)          |
| Loss of livestock                           | 121 (33.4%)          |
| Water scarcity                              | 110 (30.4%)          |
| Access to clean water                       | 103 (28.4%)          |
| Health problems                             | 95 (26.2%)           |
| Climate change and AMR                      |                      |
| Relationship between climate change and AMR |                      |

|                                                                                                    |             |
|----------------------------------------------------------------------------------------------------|-------------|
| No                                                                                                 | 242 (66.9%) |
| Yes                                                                                                | 120 (33.1%) |
| How serious Climate change and AMR at your area?                                                   |             |
| Not serious                                                                                        | 71 (19.3%)  |
| Moderately serious                                                                                 | 131 (36.2%) |
| Extremely serious                                                                                  | 36 (9.9%)   |
| Don't know                                                                                         | 125 (34.5%) |
| Should the government take responsibility for controlling the spread of AMR due to climate change? |             |
| No                                                                                                 | 169 (46.7%) |
| Yes                                                                                                | 193 (53.3%) |
| Need of awareness of climate change and AMR                                                        |             |
| No                                                                                                 | 102 (28.2%) |
| Yes                                                                                                | 260 (71.8%) |
| Desire to receive updated information on mitigation measures related to climate change and AMR     |             |
| No                                                                                                 | 110 (30.4%) |
| Yes                                                                                                | 252 (69.6%) |
| Preferred way to receive updated information                                                       |             |
| TV/Radio                                                                                           | 280 (77.3%) |
| Social media                                                                                       | 57 (15.7%)  |
| <sup>1</sup> n (%),                                                                                |             |

**Table S3.** Knowledge and attitude scores of the participants by socio-demographic variables regarding climate change in Adadle district, Somali region, Ethiopia. .

| Variables                            | Pastoralist            |                       | Agro-pastoralist       |                       | Overall                | Overall               |
|--------------------------------------|------------------------|-----------------------|------------------------|-----------------------|------------------------|-----------------------|
|                                      | Knowledge<br>Mean (SD) | Attitude<br>Mean (SD) | Knowledge<br>Mean (SD) | Attitude<br>Mean (SD) | Knowledge<br>Mean (SD) | Attitude<br>Mean (SD) |
| Sex                                  |                        |                       |                        |                       |                        |                       |
| Female                               | 46.1 (29.3)            | 51.4 (19.8)           | 48.7 (31)              | 57.6 (20.3)           | 47.3 (30.1)            | 54.4 (20.2)           |
| Male                                 | 67.7 (21)              | 64.8 (16)             | 69.9 (21.7)            | 67.7 (17.3)           | 68.9 (21.3)            | 66.3 (16.7)           |
| Age groups (years)                   |                        |                       |                        |                       |                        |                       |
| ≤ 25                                 | 38.4 (33.6)            | 47.7 (23.1)           | 45.7 (33.8)            | 57.3 (22.5)           | 41.6 (33.6)            | 51.9 (23.1)           |
| 26-35                                | 53.1 (26.8)            | 54.3 (17.7)           | 62.1 (25.8)            | 60.3 (16.8)           | 57.2 (26.6)            | 57.1 (17.5)           |
| 36-45                                | 61.9 (25.1)            | 58.9 (18.1)           | 56.6 (31.1)            | 62.1 (19.8)           | 59.1 (28.3)            | 60.5 (19)             |
| ≥ 46                                 | 48.8 (27.9)            | 58.4 (20.6)           | 51.1 (30.2)            | 61.9 (22.5)           | 50.1 (29.1)            | 60.4 (21.6)           |
| Educational level                    |                        |                       |                        |                       |                        |                       |
| Illiterate                           | 49.8 (28.7)            | 51.8 (18.5)           | 56.7 (30.3)            | 59.4 (19.4)           | 53.3 (29.7)            | 55.7 (19.4)           |
| Primary school                       | 48.2 (32.6)            | 52.7 (22)             | 52.5 (33)              | 59.6 (22.4)           | 49.9 (32.5)            | 55.4 (22.2)           |
| Religious education                  | 61.8 (22.8)            | 67.9 (15)             | 51.7 (27.3)            | 66.8 (18.8)           | 56.1 (25.7)            | 67.3 (17.2)           |
| College and above                    | 70 (20.9)              | 72.5 (19.6)           | 87.5 (NA)              | 30 (NA)               | 72.9 (20)              | 65.4 (24.7)           |
| Marital status                       |                        |                       |                        |                       |                        |                       |
| Single                               | 39.2 (39.4)            | 49.5 (29.1)           | 37.5 (37.5)            | 54.6 (22.6)           | 38.3 (37.5)            | 52.2 (25.3)           |
| Married                              | 52.5 (28.4)            | 54.7 (18.9)           | 57.4 (28.2)            | 61.5 (19.4)           | 54.9 (28.3)            | 58.1 (19.4)           |
| Widowed                              | 53.1 (13)              | 74.4 (12.3)           | 62.5 (54.5)            | 65.0 (30.4)           | 57.1 (33.2)            | 70.3 (20.2)           |
| How long they have lived in the area |                        |                       |                        |                       |                        |                       |
| < 10 years                           | 52.9 (28.6)            | 53.3 (17.1)           | 53.5 (29.5)            | 59.8 (20.7)           | 53.2 (28.9)            | 56.5 (19.2)           |
| > 10 years                           | 51 (29.3)              | 56.2 (21.4)           | 56.7 (30.5)            | 61.4 (19.4)           | 53.8 (29.9)            | 58.8 (20.5)           |
| Numbers of person per household      |                        |                       |                        |                       |                        |                       |

|            |             |             |             |             |             |             |
|------------|-------------|-------------|-------------|-------------|-------------|-------------|
| ≤ 5 person | 53.2 (27.0) | 51.9 (14.5) | 61.5 (30.2) | 57.3 (15.7) | 56.7 (28.5) | 54.1 (15.2) |
| 6-8 person | 50.9 (29.8) | 55.8 (20.6) | 52.6 (28)   | 59.9 (20.2) | 51.7 (28.7) | 57.9 (20.3) |
| > 8 person | 51.0 (31.1) | 58.7 (24.5) | 52.8 (31.6) | 64.6 (22.5) | 52 (31.2)   | 61.9 (23.5) |

**Table S4.** Knowledge and attitude scores of the participants by socio-demographic variables regarding antimicrobial resistance in Adadle district, Somali region, Ethiopia

| Variables                            | Pastoralist            |                       | Agro-pastoralist       |                       | Overall                | Overall               |
|--------------------------------------|------------------------|-----------------------|------------------------|-----------------------|------------------------|-----------------------|
|                                      | Knowledge<br>Mean (SD) | Attitude<br>Mean (SD) | Knowledge<br>Mean (SD) | Attitude<br>Mean (SD) | Knowledge<br>Mean (SD) | Attitude<br>Mean (SD) |
| Sex                                  |                        |                       |                        |                       |                        |                       |
| Female                               | 59.2 (8.1)             | 54.9 (10.3)           | 61.5 (6.9)             | 55.7 (7.5)            | 60.3 (7.6)             | 55.2 (9.1)            |
| Male                                 | 61 (7.5)               | 56.3 (9.2)            | 64.1 (7.5)             | 57.4 (9.3)            | 63 (7.6)               | 56.9 (9.2)            |
| Age groups (years)                   |                        |                       |                        |                       |                        |                       |
| ≤ 25                                 | 57.7 (10.8)            | 54.6 (9.7)            | 61.5 (7)               | 56.5 (7.4)            | 59.4 (9.4)             | 55.5 (8.8)            |
| 26-35                                | 60.5 (7.4)             | 55.3 (10.2)           | 64.5 (5.9)             | 57.6 (6)              | 62.4 (7)               | 56.3 (8.6)            |
| 36-45                                | 61.1 (6.1)             | 56 (10.2)             | 61.5 (6.8)             | 55.9 (7.7)            | 61.3 (6.4)             | 55.9 (8.7)            |
| ≥ 46                                 | 58.4 (7.9)             | 55 (10.5)             | 60.9 (8.6)             | 54.5 (11.1)           | 59.8 (8.3)             | 54.7 (10.7)           |
| Educational level                    |                        |                       |                        |                       |                        |                       |
| Illiterate                           | 59.8 (7.7)             | 54.5 (9.7)            | 62.7 (7.6)             | 55.9 (8)              | 59.4 (7.8)             | 55.2 (8.9)            |
| Primary school                       | 58.3 (8.5)             | 55.6 (11.1)           | 61.5 (7.2)             | 54.9 (8.3)            | 61.3 (8.1)             | 55.3 (9.1)            |
| Religious education                  | 60.1 (8.2)             | 58.4 (9.6)            | 61.8 (5.3)             | 57.9 (8.3)            | 61.1 (6.7)             | 58.1 (8.8)            |
| College and above                    | 67 (6.4)               | 55.7 (8.5)            | 61.9 (NA)              | 54.1 (NA)             | 66.1 (6.2)             | 55.4 (7.6)            |
| Marital status                       |                        |                       |                        |                       |                        |                       |
| Single                               | 55.4 (11.2)            | 55.4 (9.4)            | 61.2 (6.4)             | 55.1 (7.6)            | 58.7 (9.1)             | 55.2 (8.3)            |
| Married                              | 60.1 (7.8)             | 55.3 (10.1)           | 62.5 (7.1)             | 56.4 (7.9)            | 61.3 (7.6)             | 55.8 (9.1)            |
| Widowed                              | 58.3 (3.2)             | 58.5 (7.3)            | 65.1 (7.2)             | 52.4 (17.1)           | 61.2 (5.9)             | 55.9 (11.6)           |
| How long they have lived in the area |                        |                       |                        |                       |                        |                       |
| < 10 years                           | 60.1 (8.5)             | 54.3 (9.9)            | 61.8 (6.7)             | 55.5 (7.6)            | 60.9 (7.7)             | 54.8 (8.9)            |
| > 10 years                           | 60 (7.6)               | 56.1 (10)             | 62.7 (7.4)             | 56.7 (8.5)            | 61.1 (7.6)             | 56.4 (9.2)            |
| Numbers of person per household      |                        |                       |                        |                       |                        |                       |
| ≤ 5 person                           | 60.5 (7.4)             | 55.5 (8.2)            | 65.2 (6.1)             | 57.7 (6.9)            | 62.4 (7.2)             | 56.4 (7.8)            |
| 6-8 person                           | 59.3 (8.7)             | 54.3 (11.5)           | 61.5 (7.4)             | 56.1 (8.2)            | 60.4 (8.1)             | 55.2 (9.9)            |
| > 8 person                           | 59.4 (8.1)             | 56.2 (10.5)           | 60.7 (7.2)             | 55 (8.9)              | 60.1 (7.6)             | 55.5 (9.7)            |

**Table S5.** Predictors of knowledge towards climate change in Adadle district, Somali region, Ethiopia.

| Variables          | Event Rate      | OR <sup>1</sup> | 95% CI <sup>1</sup> | p-value |
|--------------------|-----------------|-----------------|---------------------|---------|
| Age group          |                 |                 |                     |         |
| < 25               | 30 / 63 (48%)   | —               | —                   |         |
| 26-35              | 75 / 124 (60%)  | 1.51            | 0.72, 3.19          | 0.3     |
| 36-45              | 71 / 102 (70%)  | 2.30            | 1.04, 5.11          | 0.040   |
| > 46               | 41 / 73 (56%)   | 0.99            | 0.42, 2.35          | >0.9    |
| Educational status |                 |                 |                     |         |
| Illiterate         | 137 / 235 (58%) | —               | —                   |         |
| Primary school     | 34 / 58 (59%)   | 1.46            | 0.68, 3.14          | 0.3     |
| Religious learning | 42 / 63 (67%)   | 1.54            | 0.80, 2.96          | 0.2     |
| College and above  | 4 / 6 (67%)     | 0.84            | 0.12, 6.05          | 0.9     |
| Marital status     |                 |                 |                     |         |
| Single             | 11 / 25 (44%)   | —               | —                   |         |
| Married            | 201 / 327 (61%) | 5.92            | 1.66, 21.1          | 0.006   |

| Variables           | Event Rate      | OR <sup>1</sup> | 95% CI <sup>1</sup> | p-value |
|---------------------|-----------------|-----------------|---------------------|---------|
| Divorced            | 1 / 3 (33%)     | 1.03            | 0.04, 30.1          | >0.9    |
| Widowed             | 4 / 7 (57%)     | 3.45            | 0.44, 27.2          | 0.2     |
| <b>Occupation</b>   |                 |                 |                     |         |
| Housewife           | 113 / 212 (53%) | —               | —                   |         |
| Government employee | 12 / 19 (63%)   | 6.45            | 1.48, 28.0          | 0.013   |
| Pastoralist         | 44 / 56 (79%)   | 5.18            | 2.33, 11.5          | <0.001  |
| farmer              | 12 / 23 (52%)   | 0.73            | 0.28, 1.92          | 0.5     |
| Business            | 36 / 52 (69%)   | 3.45            | 1.50, 7.92          | 0.003   |

<sup>1</sup>OR = Odds Ratio, CI = Confidence Interval

**Table S6.** Predictors of attitude towards climate change in Adadle district, Somali region, Ethiopia.

| Variables                                   | Event Rate      | OR <sup>1</sup> | 95% CI <sup>1</sup> | p-value |
|---------------------------------------------|-----------------|-----------------|---------------------|---------|
| <b>Sex</b>                                  |                 |                 |                     |         |
| Female                                      | 122 / 257 (47%) | —               | —                   |         |
| Male                                        | 72 / 105 (69%)  | 3.14            | 1.44, 6.88          | 0.004   |
| <b>Age</b>                                  |                 |                 |                     |         |
| < 25                                        | 27 / 63 (43%)   | —               | —                   |         |
| 26-35                                       | 64 / 124 (52%)  | 1.54            | 0.75, 3.16          | 0.2     |
| 36-45                                       | 60 / 102 (59%)  | 1.76            | 0.80, 3.85          | 0.2     |
| > 46                                        | 43 / 73 (59%)   | 1.59            | 0.68, 3.70          | 0.3     |
| <b>Occupation</b>                           |                 |                 |                     |         |
| Housewife                                   | 107 / 212 (50%) | —               | —                   |         |
| Government employee                         | 10 / 19 (53%)   | 0.85            | 0.24, 2.99          | 0.8     |
| Pastoralist                                 | 33 / 56 (59%)   | 0.62            | 0.25, 1.53          | 0.3     |
| Farmer                                      | 11 / 23 (48%)   | 0.19            | 0.06, 0.62          | 0.006   |
| Business owner                              | 33 / 52 (63%)   | 0.81            | 0.36, 1.84          | 0.6     |
| <b>Educational status</b>                   |                 |                 |                     |         |
| Illiterate                                  | 111 / 235 (47%) | —               | —                   |         |
| Primary school                              | 30 / 58 (52%)   | 1.55            | 0.76, 3.17          | 0.2     |
| Religious learning                          | 50 / 63 (79%)   | 4.13            | 2.03, 8.41          | <0.001  |
| College and above                           | 3 / 6 (50%)     | 1.21            | 0.19, 7.75          | 0.8     |
| <b>How long they have lived in the area</b> |                 |                 |                     |         |
| < 10 years                                  | 73 / 153 (48%)  | —               | —                   |         |
| > 10 years                                  | 121 / 209 (58%) | 1.46            | 0.90, 2.38          | 0.13    |

<sup>1</sup>OR = Odds Ratio, CI = Confidence Interval

**Table S7.** Predictors of knowledge towards antimicrobial and antimicrobial resistance in Adadle district, Somali region, Ethiopia.

| Variables                 | Event Rate      | OR <sup>1</sup> | 95% CI <sup>1</sup> | p-value |
|---------------------------|-----------------|-----------------|---------------------|---------|
| <b>Sex</b>                |                 |                 |                     |         |
| Female                    | 106 / 257 (41%) | —               | —                   |         |
| Male                      | 66 / 105 (63%)  | 5.48            | 2.40, 12.5          | <0.001  |
| <b>Educational status</b> |                 |                 |                     |         |
| Illiterate                | 122 / 235 (52%) | —               | —                   |         |
| Primary school            | 22 / 58 (38%)   | 0.79            | 0.38, 1.64          | 0.5     |
| Religious learning        | 23 / 63 (37%)   | 0.49            | 0.25, 0.95          | 0.035   |
| College and above         | 5 / 6 (83%)     | 14.0            | 0.87, 225           | 0.062   |
| <b>Age</b>                |                 |                 |                     |         |

| Variables                       | Event Rate     | OR <sup>1</sup> | 95% CI <sup>1</sup> | p-value |
|---------------------------------|----------------|-----------------|---------------------|---------|
| < 25                            | 19 / 63 (30%)  | —               | —                   |         |
| 26-35                           | 71 / 124 (57%) | 2.39            | 1.17, 4.89          | 0.017   |
| 36-45                           | 52 / 102 (51%) | 1.98            | 0.91, 4.31          | 0.086   |
| > 46                            | 30 / 73 (41%)  | 1.49            | 0.63, 3.50          | 0.4     |
| Occupation                      |                |                 |                     |         |
| Housewife                       | 96 / 212 (45%) | —               | —                   |         |
| Government employee             | 6 / 19 (32%)   | 0.25            | 0.05, 1.19          | 0.081   |
| Pastoralist                     | 32 / 56 (57%)  | 0.40            | 0.16, 1.01          | 0.052   |
| Farmer                          | 8 / 23 (35%)   | 0.23            | 0.07, 0.73          | 0.013   |
| Business owner                  | 30 / 52 (58%)  | 1.07            | 0.48, 2.39          | 0.9     |
| Numbers of person per household |                |                 |                     |         |
| < 5                             | 75 / 129 (58%) | —               | —                   |         |
| 6–8                             | 53 / 121 (44%) | 0.56            | 0.32, 0.97          | 0.038   |
| > 8                             | 44 / 112 (39%) | 0.51            | 0.28, 0.95          | 0.035   |

<sup>1</sup>OR = Odds Ratio, CI = Confidence Interval

**Table S8.** Predictors of attitude towards antimicrobial and antimicrobial resistance at multivariable level in Adadle district, Somali region, Ethiopia.

| Variables           | Event Rate      | OR <sup>1</sup> | 95% CI <sup>1</sup> | p-value |
|---------------------|-----------------|-----------------|---------------------|---------|
| Sex                 |                 |                 |                     |         |
| Female              | 139 / 257 (54%) | —               | —                   |         |
| Male                | 65 / 105 (62%)  | 2.64            | 1.28, 5.47          | 0.009   |
| Educational status  |                 |                 |                     |         |
| Illiterate          | 125 / 235 (53%) | —               | —                   |         |
| Primary school      | 32 / 58 (55%)   | 1.17            | 0.59, 2.34          | 0.6     |
| Religious learning  | 44 / 63 (70%)   | 1.99            | 1.06, 3.74          | 0.033   |
| College and above   | 3 / 6 (50%)     | 1.17            | 0.20, 6.74          | 0.9     |
| Age                 |                 |                 |                     |         |
| < 25                | 34 / 63 (54%)   | —               | —                   |         |
| 26-35               | 74 / 124 (60%)  | 1.10            | 0.56, 2.16          | 0.8     |
| 36–45               | 57 / 102 (56%)  | 0.90            | 0.44, 1.84          | 0.8     |
| > 46                | 39 / 73 (53%)   | 0.86            | 0.39, 1.87          | 0.7     |
| Occupation          |                 |                 |                     |         |
| Housewife           | 126 / 212 (59%) | —               | —                   |         |
| Government employee | 10 / 19 (53%)   | 0.48            | 0.14, 1.58          | 0.2     |
| Pastoralist         | 30 / 56 (54%)   | 0.37            | 0.16, 0.87          | 0.022   |
| Farmer              | 14 / 23 (61%)   | 0.48            | 0.16, 1.43          | 0.2     |
| Business owner      | 24 / 52 (46%)   | 0.33            | 0.15, 0.71          | 0.005   |

<sup>1</sup>OR = Odds Ratio, CI = Confidence Interval

**Table S9.** the percentage of householders' knowledge, attitude, and practice (KAP) scores in Adadle district, Somali region, Ethiopia.

|                                | Agro pastoralist<br>(N=179) | Pastoralist<br>(N=183) | p-value |
|--------------------------------|-----------------------------|------------------------|---------|
| Knowledge about Climate Change |                             |                        |         |
| Mean (SD)                      | 55.3 (30.1)                 | 51.9 (28.9)            | 0.265   |
| Median [Min, Max]              | 62.5 [0, 100]               | 56.3 [0, 100]          |         |
| Attitude about Climate Change  |                             |                        |         |
| Mean (SD)                      | 60.7 (20.0)                 | 55.0 (19.7)            | 0.00623 |



|                                 | <b>Agro pastoralist<br/>(N=179)</b> | <b>Pastoralist<br/>(N=183)</b> | <b><i>p</i>-value</b> |
|---------------------------------|-------------------------------------|--------------------------------|-----------------------|
| Median [Min, Max]               | 60.0 [20.0, 90.0]                   | 55.0 [10.0, 100]               |                       |
| Climate Change practice         |                                     |                                |                       |
| Mean (SD)                       | 20.4 (24.1)                         | 23.6 (25.2)                    | 0.218                 |
| Median [Min, Max]               | 16.7 [0, 100]                       | 33.3 [0, 100]                  |                       |
| Knowledge about AMR             |                                     |                                |                       |
| Mean (SD)                       | 50.1 (20.5)                         | 47.2 (15.2)                    | 0.131                 |
| Median [Min, Max]               | 53.3 [6.67, 93.3]                   | 46.7 [6.67, 100]               |                       |
| Attitude about AMR              |                                     |                                |                       |
| Mean (SD)                       | 56.2 (8.13)                         | 55.3 (10.0)                    | 0.354                 |
| Median [Min, Max]               | 57.6 [30.6, 75.3]                   | 56.5 [29.4, 80.0]              |                       |
| Antibiotic use and AMR practice |                                     |                                |                       |
| Mean (SD)                       | 40.1 (16.7)                         | 42.8 (14.1)                    | 0.103                 |
| Median [Min, Max]               | 42.9 [0, 71.4]                      | 42.9 [14.3, 75.0]              |                       |
